# Supplementary material
Source: PubMed Central journal article supplement (PMC10841189)
Supplement: NIHMS1927945-supplement-4.pdf [file NIHMS1927945-supplement-4.pdf]

A

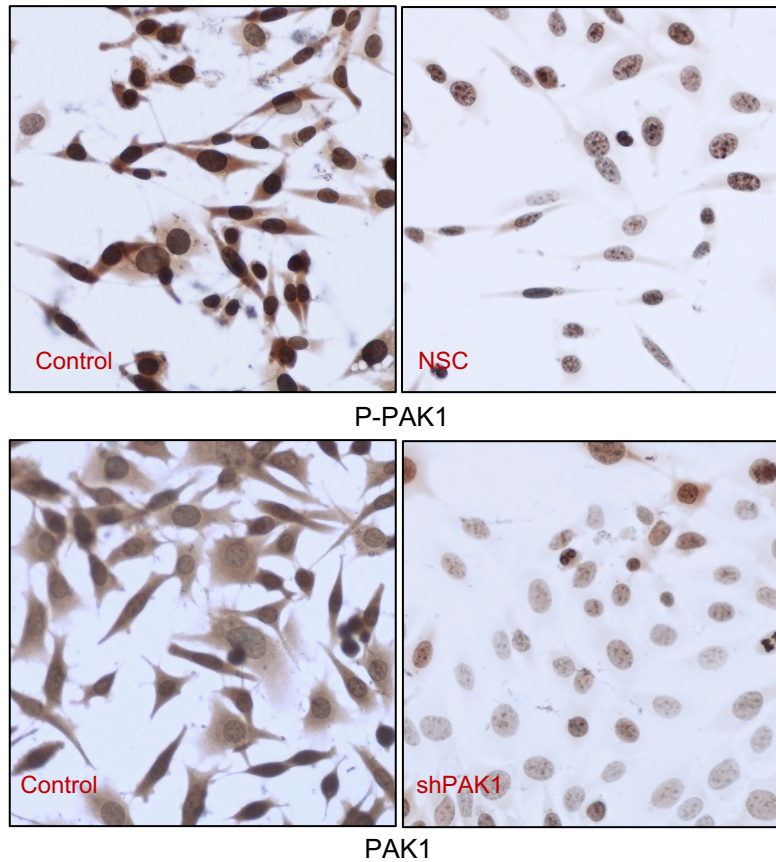

B

| Patient Characteristics |        | Total patient numbers | PAK1 expression |           | p-value | p-PAK1 expression |             | p-value |
|-------------------------|--------|-----------------------|-----------------|-----------|---------|-------------------|-------------|---------|
|                         |        |                       | PAK1 Low        | PAK1 High |         | p-PAK1 Low        | p-PAK1 High |         |
| Gleason score           | ≤7     | 10                    | 10              | 0         | 0.0098  | 10                | 0           | 0.001   |
|                         | >7     | 10                    | 5               | 5         |         | 3                 | 7           |         |
| Stage                   | I/II   | 11                    | 11              | 0         | 0.0043  | 10                | 1           | 0.0072  |
|                         | III/IV | 9                     | 4               | 5         |         | 3                 | 6           |         |
| Distant metastasis      | M0     | 16                    | 13              | 3         | 0.1967  | 11                | 5           | 0.4819  |
|                         | M1     | 4                     | 2               | 2         |         | 2                 | 2           |         |
| Lymph node metastasis   | N0     | 17                    | 12              | 5         | 0.2781  | 12                | 5           | 0.2123  |
|                         | N1     | 3                     | 3               | 0         |         | 1                 | 2           |         |
| Age (Years)             | ≤70    | 12                    | 9               | 3         | >0.99   | 8                 | 4           | 0.85    |
|                         | >70    | 8                     | 6               | 2         |         | 5                 | 3           |         |

PCa n=20
