# Supplementary material
Source: PubMed Central journal article supplement (PMC10841189)

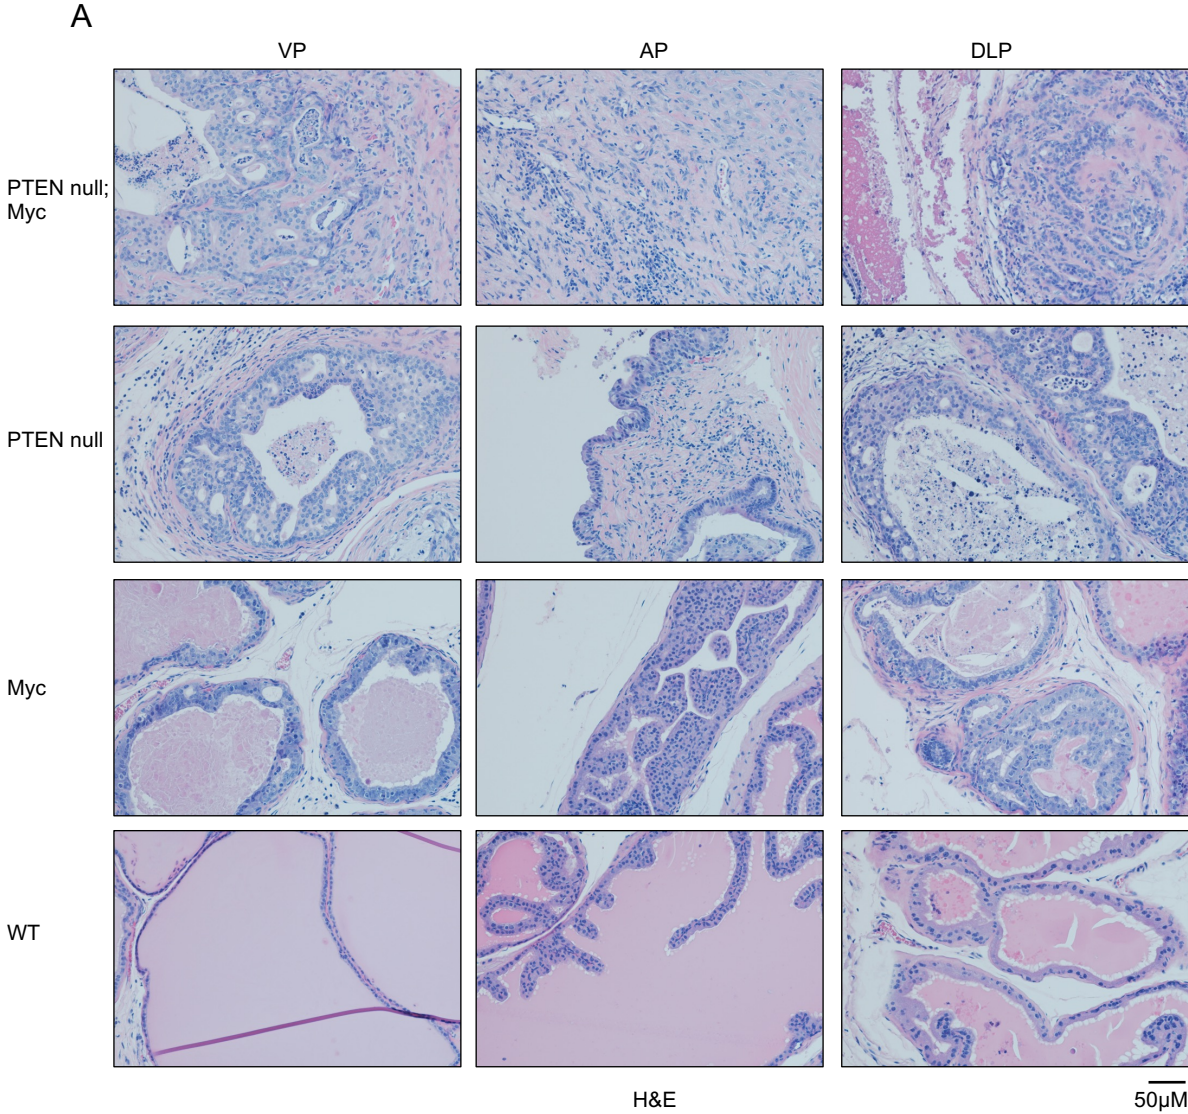

Supplement: NIHMS1927945-supplement-1.pdf [file NIHMS1927945-supplement-1.pdf]

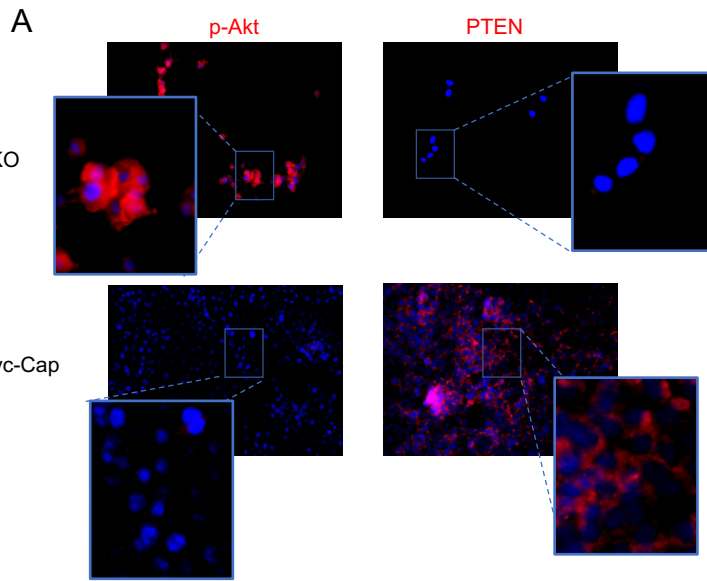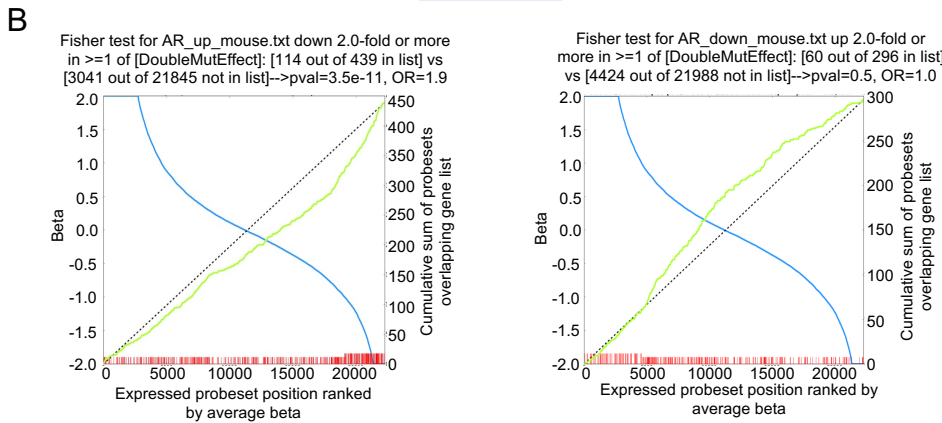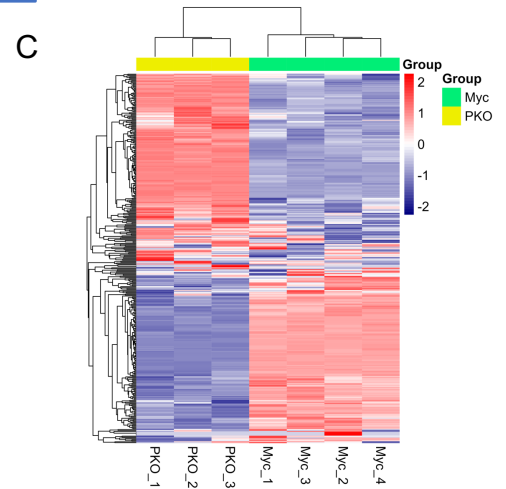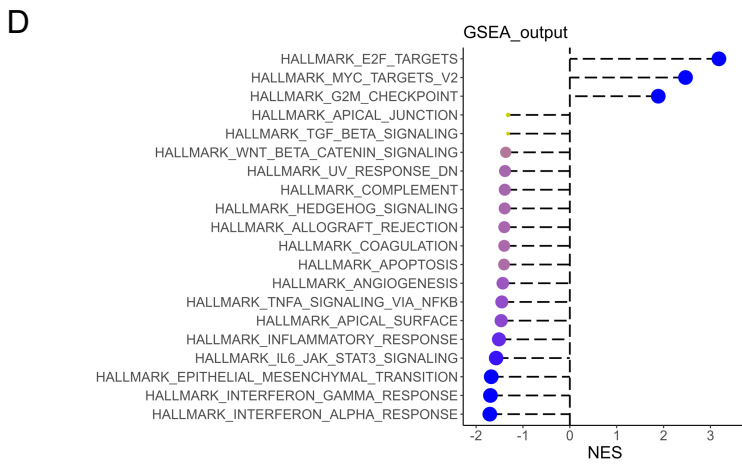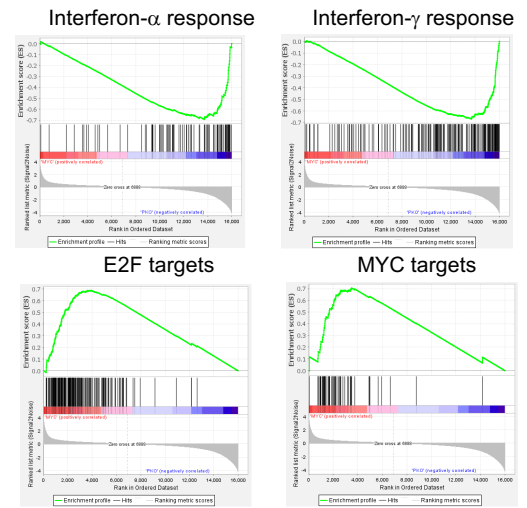

Myc-Cap vs PKO

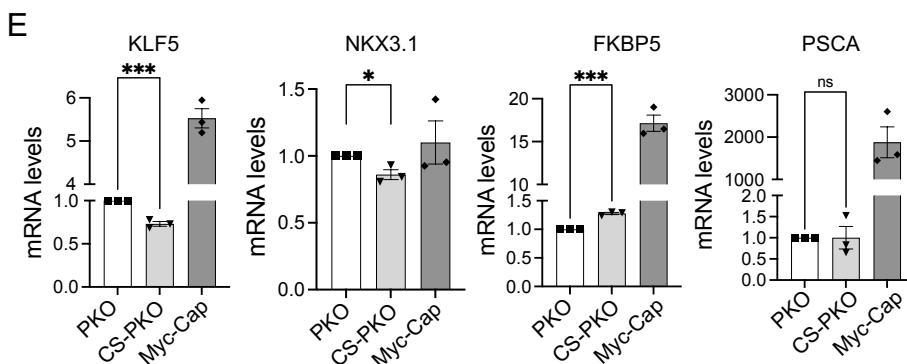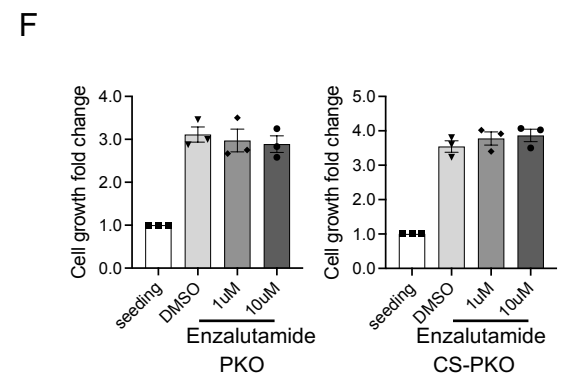

Supplement: NIHMS1927945-supplement-2.pdf [file NIHMS1927945-supplement-2.pdf]

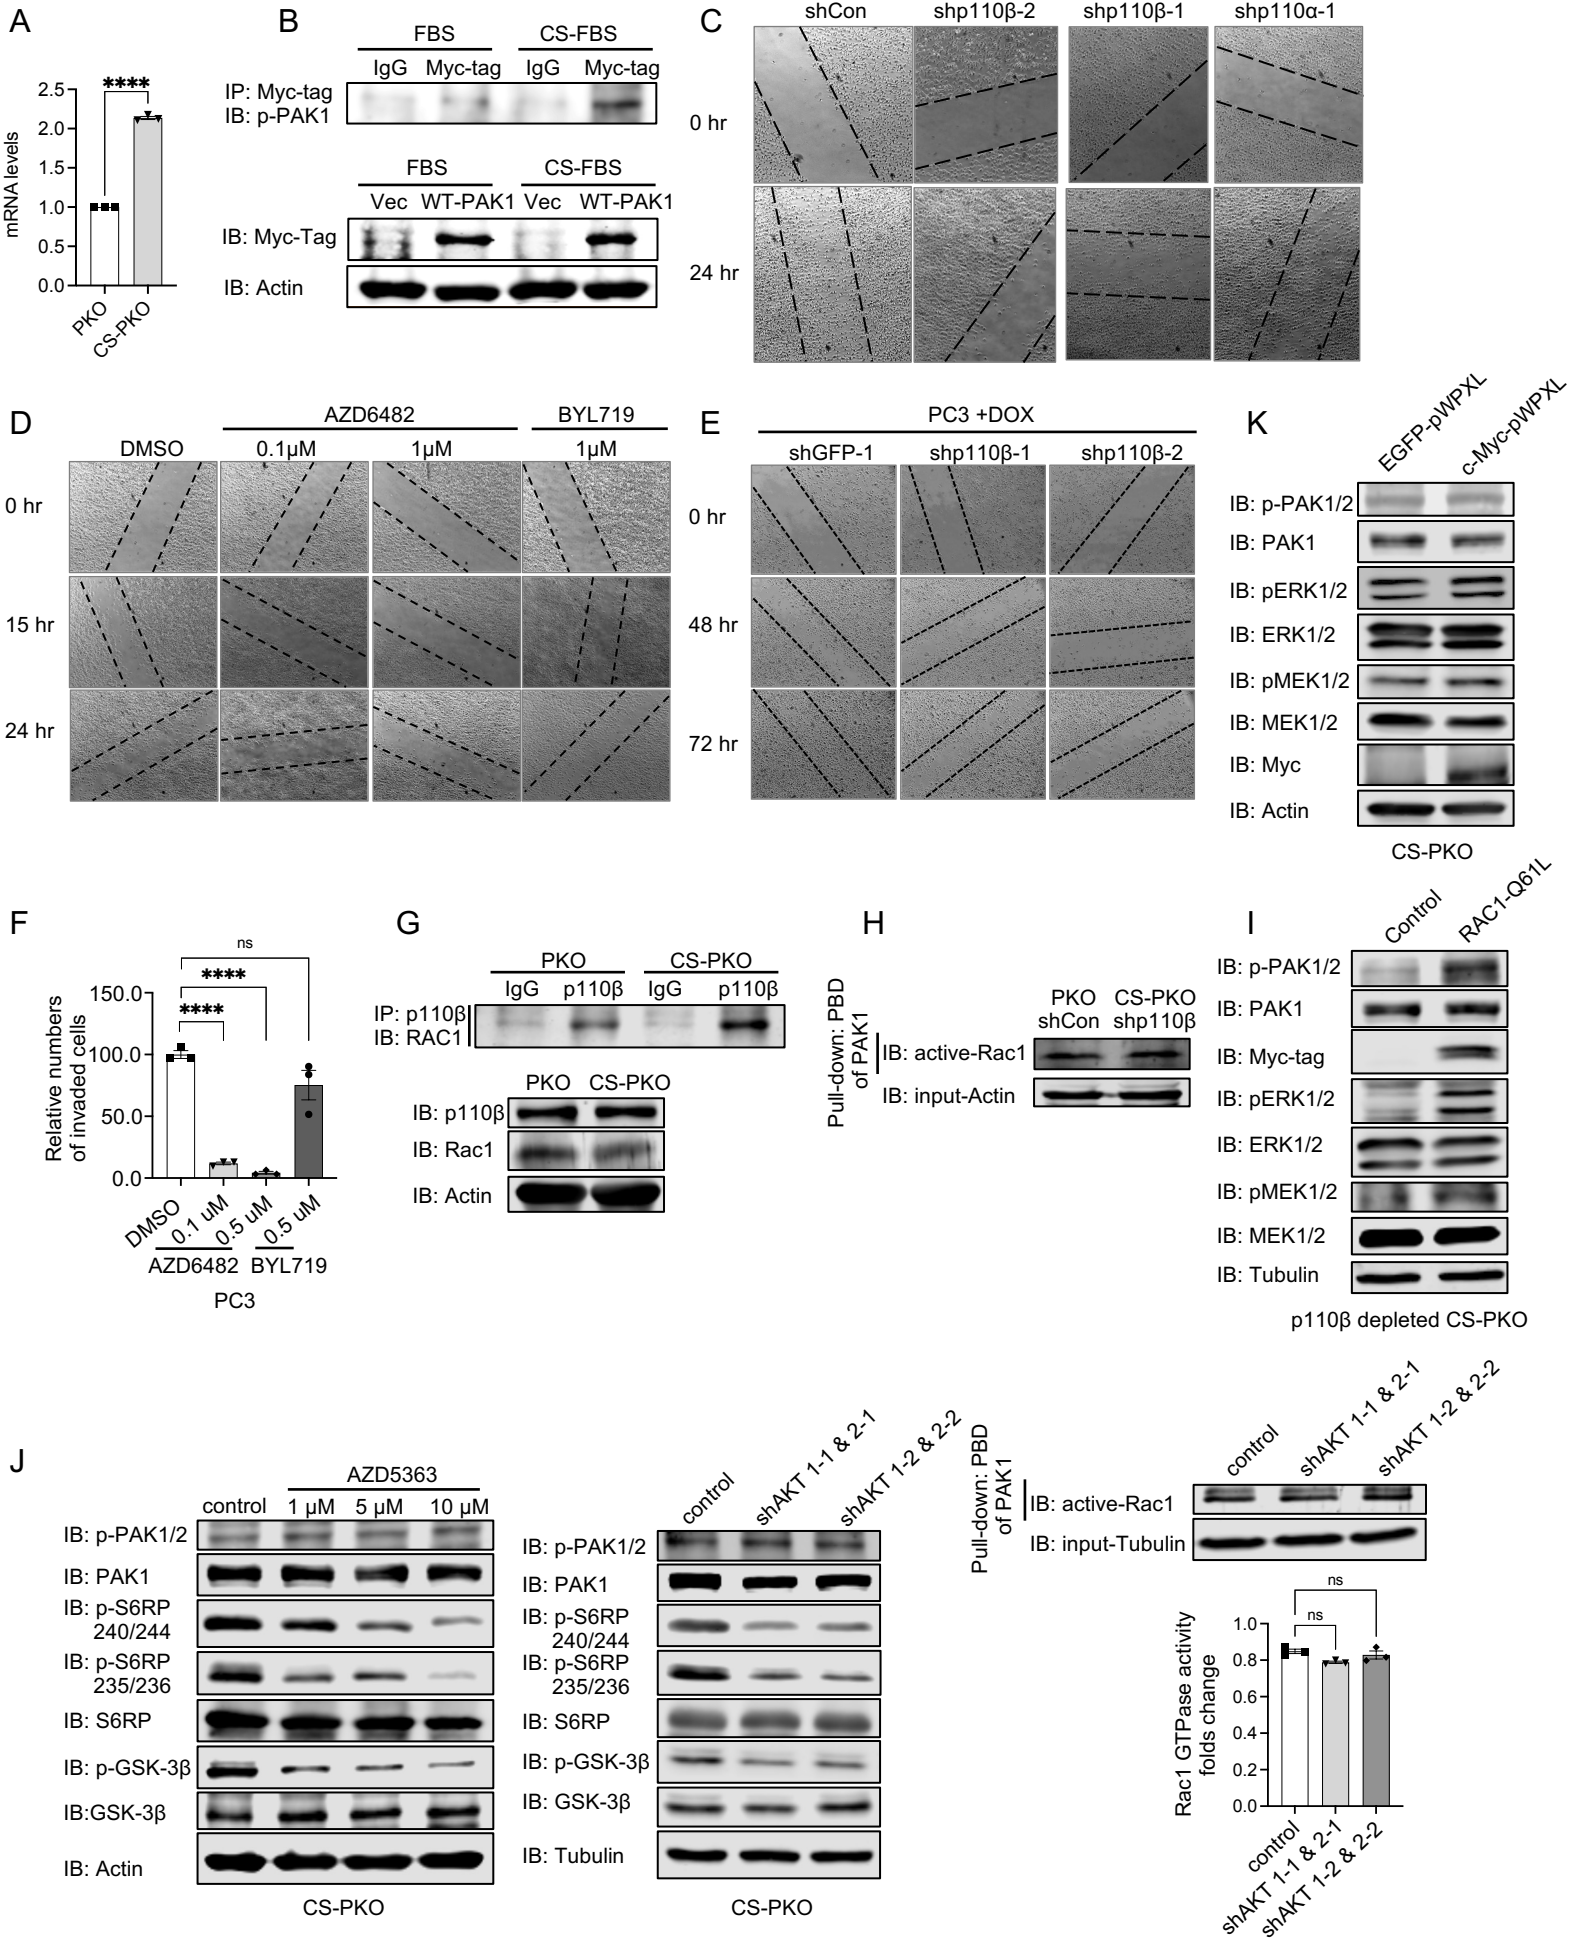

Supplement: NIHMS1927945-supplement-3.pdf [file NIHMS1927945-supplement-3.pdf]

A

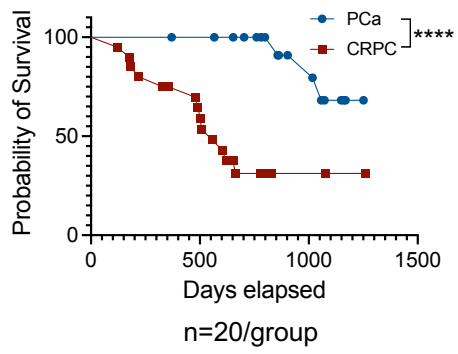

B

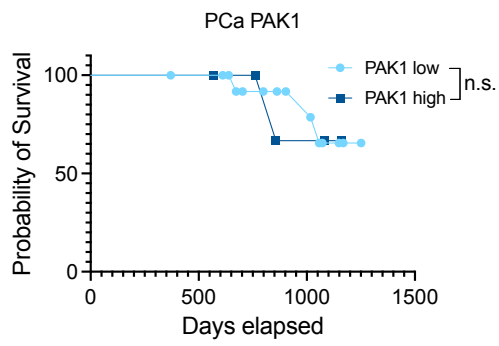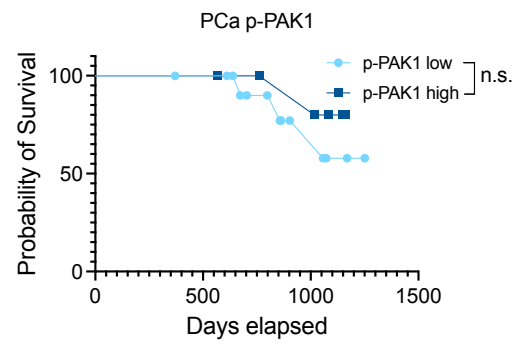

Supplement: NIHMS1927945-supplement-5.pdf [file NIHMS1927945-supplement-5.pdf]
